# Supplementary material for: Management and Outcome of Young Women (≤40 Years) with Breast Cancer in Switzerland
Source: MDPI journal article supplement (doi:10.3390/cancers14051328), 2022-03-04
Supplement: s1 [file s1]

# Management and Outcome of Young Women ( $\leq 40$ years) with Breast Cancer in Switzerland

Giacomo Montagna, Robin Schaffar, Andrea Bordoni, Alessandra Spitale, Daniela Andreina Terribile, Lorenzo Rossi, Yvan Bergeron, Bernadette W.A. van der Linden, Isabelle Konzelmann, Sabine Rohrmann, Katharina Staehelin, Manuela Maspoli-Conconi, Jean-Luc Bulliard, Francesco Meani, Olivia Pagani and Elisabetta Rapiti

Table S1. Number of cases per canton per year .

| Year of diagnosis | Number of cases/canton/year |          |             |                     |        |      |        |           |        |      |
|-------------------|-----------------------------|----------|-------------|---------------------|--------|------|--------|-----------|--------|------|
|                   | Zurich                      | Fribourg | Basel Stadt | Basel<br>Landschaft | Ticino | Vaud | Wallis | Neuchatel | Geneva | Jura |
| 2000              | 41                          |          | 14          | 10                  | 10     | 33   | 12     | 7         | 16     |      |
| 2001              | 52                          |          | 4           | 9                   | 12     | 24   | 14     | 5         | 20     |      |
| 2002              | 38                          |          | 6           | 7                   | 16     | 28   | 12     | 7         | 17     |      |
| 2003              | 52                          |          | 9           | 3                   | 13     | 35   | 10     | 6         | 22     |      |
| 2004              | 62                          |          | 3           | 12                  | 22     | 23   | 8      | 8         | 29     |      |
| 2005              | 51                          |          | 7           | 10                  | 11     | 32   | 8      | 8         | 23     | 3    |
| 2006              | 44                          | 14       | 9           | 14                  | 15     | 32   | 10     | 8         | 22     | 0    |
| 2007              | 57                          | 11       | 5           | 6                   | 9      | 35   | 9      | 6         | 29     | 2    |
| 2008              | 70                          | 8        | 6           | 5                   | 15     | 38   | 10     | 3         | 25     | 1    |
| 2009              | 61                          | 19       | 7           | 12                  | 13     | 38   | 13     | 7         | 20     | 3    |
| 2010              | 58                          | 21       | 3           | 12                  | 17     | 41   | 13     | 6         | 21     | 1    |
| 2011              | 39                          | 18       | 5           | 10                  | 12     | 46   | 9      | 10        | 27     | 1    |
| 2012              | 58                          | 17       |             |                     | 14     | 34   | 12     | 5         | 18     | 3    |
| 2013              | 65                          | 13       |             |                     | 19     | 32   | 15     | 7         | 28     | 2    |
| 2014              | 72                          | 10       |             |                     | 10     | 41   | 12     | 3         | 19     | 1    |

Table S2. Univariate and multivariable associations between clinicopathological factors and net survival.

|                                      | Univariable           |                    | Multivariable*        |                    |
|--------------------------------------|-----------------------|--------------------|-----------------------|--------------------|
|                                      | Hazard ratio (95% CI) | P                  | Hazard ratio (95% CI) | P                  |
| <b>Linguistic/geographic/ region</b> |                       |                    |                       |                    |
| German region                        | Ref                   |                    |                       |                    |
| Latin region                         | 0.73 (0.58-0.90)      | <b>0.003</b>       | 0.85 (0.68-1.03)      | 0.138              |
| <b>Age group</b>                     |                       |                    |                       |                    |
| $\leq 35$                            | Ref                   |                    |                       |                    |
| $>35$                                | 0.76 (0.61-0.95)      | <b>0.016</b>       | 0.85 (0.67-1.06)      | 0.153              |
| <b>Quality of care score</b>         |                       |                    |                       |                    |
| 1 <sup>st</sup> tertile              | Ref                   |                    |                       |                    |
| 2 <sup>nd</sup> tertile              | 0.83 (0.60-1.16)      | 0.284              |                       |                    |
| 3 <sup>rd</sup> tertile              | 0.94 (0.69-1.27)      | 0.670              |                       |                    |
| 100%                                 | 0.82 (0.63-1.08)      | 0.167              |                       |                    |
| <b>Period of diagnosis</b>           |                       |                    |                       |                    |
| 2000-2004                            | Ref                   |                    | Ref                   |                    |
| 2005-2009                            | 0.66 (0.52-0.85)      | <b>0.001</b>       | 0.57 (0.44-0.74)      | <b>&lt; 0.0001</b> |
| 2010-2014                            | 0.65 (0.48-0.89)      | <b>0.008</b>       | 0.58 (0.41-0.80)      | <b>0.001</b>       |
| <b>Tumor differentiation</b>         |                       |                    |                       |                    |
| Well                                 | Ref                   |                    | Ref                   |                    |
| Moderately                           | 3.83 (1.61-9.11)      | <b>0.002</b>       | 2.84 (1.19-6.75)      | <b>0.018</b>       |
| Poorly                               | 6.63 (2.82-15.64)     | <b>&lt; 0.0001</b> | 3.92 (1.63-9.41)      | <b>0.002</b>       |
| Missing                              | 6.00 (2.24-16.10)     | <b>&lt; 0.0001</b> | 3.50 (1.26-9.46)      | <b>0.016</b>       |

| Tumor Stage     |                   |          |                  |          |
|-----------------|-------------------|----------|------------------|----------|
| I               | Ref               |          | Ref              |          |
| II              | 2.96 (2.05-4.28)  | < 0.0001 | 2.60 (1.79-3.74) | < 0.0001 |
| III             | 7.01 (4.77-10.30) | < 0.0001 | 6.13 (4.16-9.05) | < 0.0001 |
| Missing         | 5.44 (2.24-16.10) | < 0.0001 | 4.76 (2.96-7.68) | < 0.0001 |
| Tumor subtype   |                   |          |                  |          |
| Triple negative | Ref               |          |                  |          |
| Luminal A like  | 0.38 (0.25-0.56)  | < 0.0001 | 0.60 (0.38-0.92) | 0.021    |
| Luminal B like  | 0.76 (0.57-1.01)  | 0.057    | 0.82 (0.61-1.11) | 0.186    |
| HER2+           | 1.12 (0.72-1.75)  | 0.602    | 0.94 (0.61-1.47) | 0.780    |
| Unknown         | 0.66 (0.47-0.94)  | 0.02     | 0.66 (0.44-0.96) | 0.032    |

\* adjusted for linguistic/geographic region, age, period of diagnosis, tumor differentiation, stage and subtype.

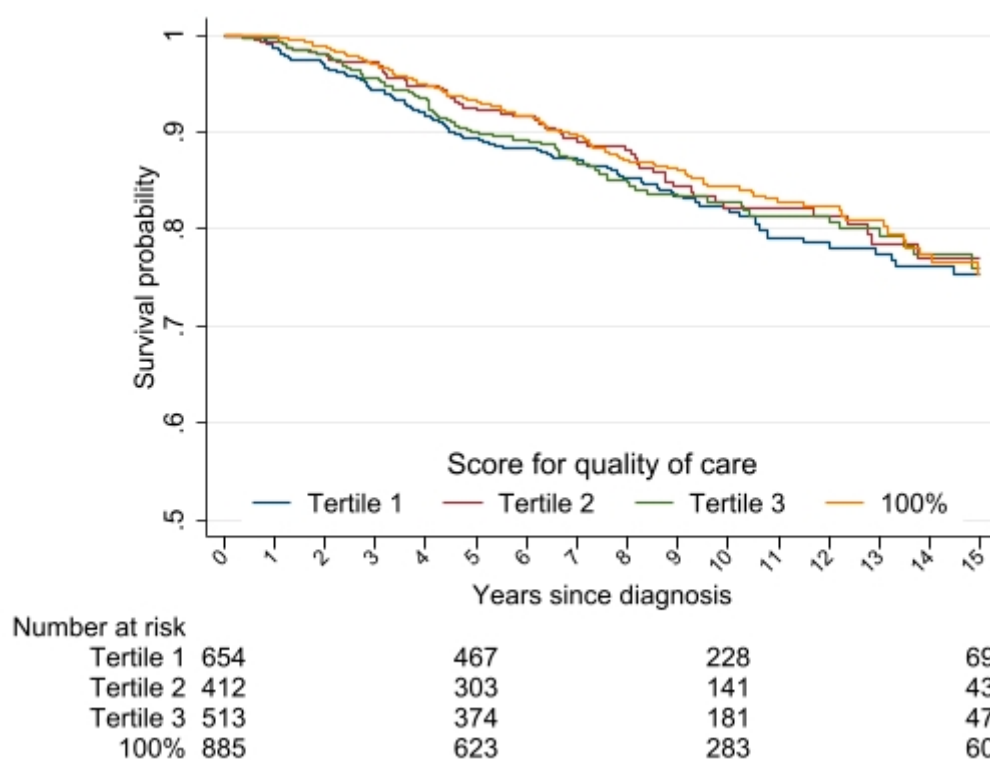

Figure S1. Kaplan-Meier estimates for overall survival by quality-of-care score tertiles.
